# Supplementary material for: IL-12 Gene Electrotransfer Triggers a Change in Immune Response within Mouse Tumors
Source: PubMed Central journal article supplement (PMC6315808; doi:10.3390/cancers10120498), 2018-12-08
Supplement: cancers-10-00498-s001.pdf [file cancers-10-00498-s001.pdf]

## Supplementary Materials: IL-12 Gene Electrotransfer Triggers a Change in Immune Response within Mouse Tumors

Guilan Shi, Chelsea Edelblute, Sezgi Arpag, Cathryn Lundberg and Richard Heller

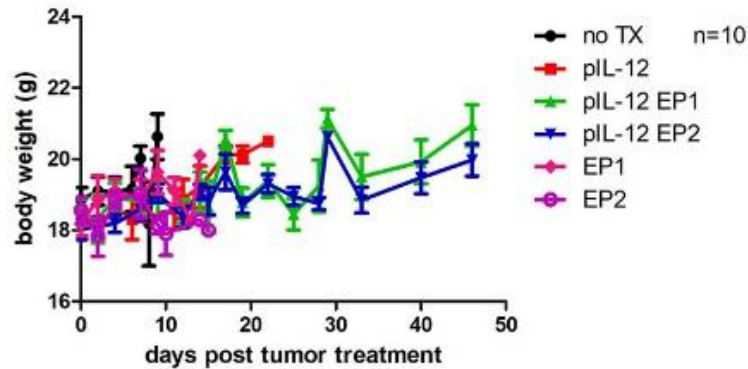

**Figure S1.** pIL-12 GET therapy associated with minimal systemic toxicity. On day 7, C57BL/6 mice were inoculated with B16F10 cells ( $1 \times 10^6/50\mu\text{L}$ , s.c in the left flank.). Tumor-bearing C57BL/6 mice were treated with pIL-12 GET on day 0, 4 and 7. Animal weight data. Tumor-bearing mice did not show weight loss comparing the no TX group. The data presented are representative of two independent experiments. Each value represents the mean  $\pm$  SEM of the group (animals in each group,  $n = 8$ -13).

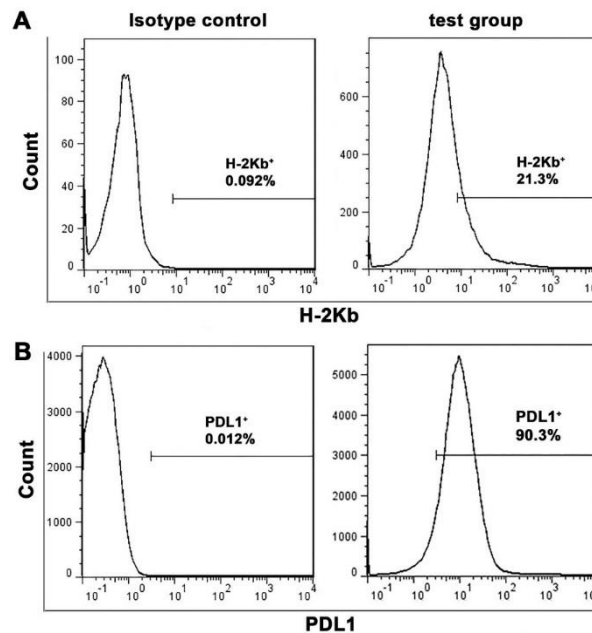

**Figure S2.** H-2Kb and PDL1 expression in B16F10 melanoma tumor cells. The H-2Kb and PDL1 expression in B16F10 tumor cells from tumor tissue (no TX group) were detected with flow cytometry at day 9. H-2Kb (A) and PDL1 (B) expression in B16F10 melanoma cells.

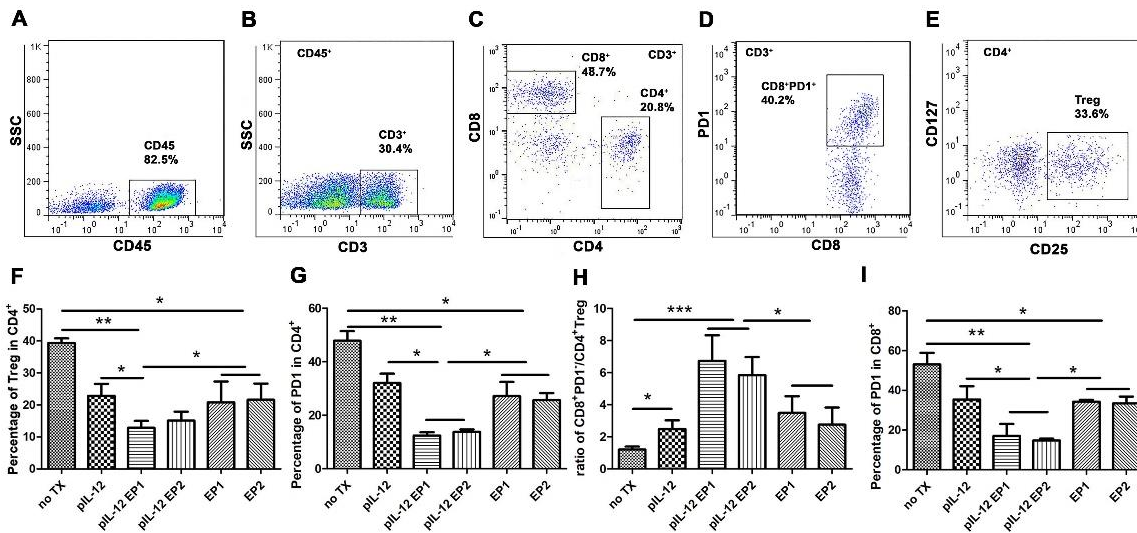

**Figure S3.** Exhausted CD8<sup>+</sup>PD1<sup>+</sup>, CD4<sup>+</sup> Treg in tumor-infiltrating lymphocytes (TILs). TILs from tumors tissue were collected at day 9 for flow cytometry assay. (A–E) Flow cytometry gating strategy used for defining immune cell subsets. (F–I) CD4<sup>+</sup> Treg, CD4<sup>+</sup>PD1<sup>+</sup>, ratio of CD8<sup>+</sup>PD1<sup>+</sup>/Treg, Exhausted CD8<sup>+</sup>PD1<sup>+</sup> in TILs. One-way ANOVA,  $p^* < 0.05$ ,  $p^{**} < 0.01$ ,  $p^{***} < 0.001$ .

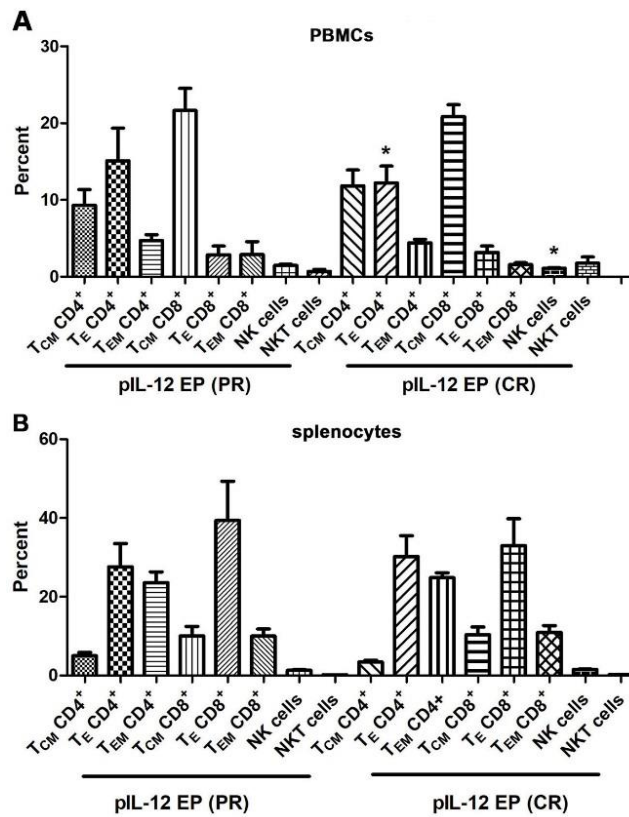

**Figure S4.** The changes of immune cells in pIL-12 GET induced prevention of new tumor formation following rechallenge. Peripheral blood mononuclear cells (PBMCs) (A) and splenocytes (B) were harvested at 20–30 days post rechallenge with  $5 \times 10^5$  B16F10 cells from PR and CR mice for flow cytometry assay. Pooled data from two independent experiments are shown as mean  $\pm$  SEM. (animals in each group,  $n = 8-13$ ). Independent  $t$ -test,  $p^* < 0.05$ .
